# Supplementary material
Source: Research Square preprint supplement (doi:10.21203/rs.3.rs-10278192/v1)

**Table S1** List of 9 pathogens detected by serum IgM

| **Category** | **Pathogens** |
| --- | --- |
| **Virus (5 items)** | Parainfluenza viruses 1/2/3, |
| Respiratory syncytial virus |
| Influenza A virus |
| Influenza B virus |
| Adenovirus |
| **Atypical pathogens**  **(4 items)** | *Mycoplasma pneumoniae* |
| *Chlamydia pneumoniae* |
| *Legionella pneumophila* |
| *Coxiella burnetii* |

**Table S2** List of 13 pathogens detected by multiplex real-time PCR

| **Category** | **Pathogens** |
| --- | --- |
| **Virus (11 items)** | Human rhinovirus |
| Human bocavirus |
| Human parainfluenza virus |
| Human coronavirus |
| Respiratory syncytial virus |
| Influenza A virus |
| Influenza A virus subtype H1N1 |
| Influenza A virus subtype H3N2 |
| Human metapneumovirus |
| Influenza B virus |
| Adenovirus |
| **Atypical pathogens**  **(2 items)** | *Mycoplasma pneumoniae* |
| *Chlamydia pneumoniae* |

**Table S3** Definitions of clinical severity outcomes

| **Outcomes** | **Definitions** |
| --- | --- |
| Physician diagnosis of severe pneumonia | Confirmed based on the final, official discharge diagnoses documented in the electronic medical record system. |
| Oxygen administration | Requirement for and delivery of supplemental oxygen support during hospitalization, encompassing low- or high-flow nasal cannula, face mask, non-invasive ventilation (e.g., CPAP/BiPAP), or invasive mechanical ventilation, tailored to the depth of hypoxemia and host clinical dynamics. |
| Extrapulmonary complications | Documented clinical or laboratory diagnosis of systemic multi-organ complications secondary to the primary infection, explicitly including encephalitis, myelitis, arterial embolism, cerebral infarction, thrombosis, myocarditis, pericarditis, Kawasaki disease, thrombocytopenia, autoimmune hemolytic anemia, disseminated intravascular coagulation (DIC), or acute liver dysfunction. |
| Pediatric intensive care unit (PICU) admission | Any record of transfer to or admission into the PICU at any point during the course of the current hospitalization due to respiratory deterioration or systemic instability. |

**Table S4** Characteristics of moderate-to-late preterm and full-term infants (1 month to <2 years) in Subcohort A before and after propensity score matching.

|  | **Full cohort** | | | **Propensity score–matched cohort** | | |
| --- | --- | --- | --- | --- | --- | --- |
|  | **Full-term** | **Moderate-to-late preterm** | SMD | **Full-term** | **Moderate to late preterm** | SMD |
| **Number of participants** | 5982 | 279 |  | 4144 | 279 | 0.005 |
| **Age, median (IQR), years** | 0.84 (0.42, 1.34) | 0.69 (0.33, 1.29) | 0.141 | 0.72 (0.38, 1.22) | 0.69 (0.33, 1.29) |  |
| **Sex (n, %)** |  |  | 0.052 |  |  | 0.001 |
| Boys | 3840 (64.19) | 186 (66.67) |  | 2760 (66.60) | 186 (66.67) |  |
| Girls | 2142 (35.81) | 93 (33.33) |  | 1384 (33.40) | 93 (33.33) |  |
| **Calendar year** |  |  | 0.260 |  |  | 0.040 |
| 2021 | 536 (8.96) | 12 (4.30) |  | 172 (4.15) | 12 (4.30) |  |
| 2022 | 707 (11.82) | 22 (7.89) |  | 354 (8.54) | 22 (7.89) |  |
| 2023 | 1334 (22.30) | 64 (22.94) |  | 993 (23.96) | 64 (22.94) |  |
| 2024 | 1580 (26.41) | 74 (26.52) |  | 1097 (26.47) | 74 (26.52) |  |
| 2025 | 1825 (30.51) | 107 (38.35) |  | 1528 (36.87) | 107 (38.35) |  |
| **Admission season** |  |  | 0.087 |  |  | 0.024 |
| Spring (March to May) | 1704 (28.49) | 84 (30.11) |  | 1273 (30.72) | 84 (30.11) |  |
| Summer (June to August) | 1356 (22.67) | 64 (22.94) |  | 968 (23.36) | 64 (22.94) |  |
| Autumn (September to November) | 1365 (22.82) | 54 (19.35) |  | 768 (18.53) | 54 (19.35) |  |
| Winter (December to February) | 1557 (26.03) | 77 (27.60) |  | 1135 (27.39) | 77 (27.60) |  |

**Abbreviations:** IQR=interqutile range; SMD==standard mean difference

**Table S5** Characteristics of moderate-to-late preterm and full-term children in early childhood (2-<6 years) within Subcohort A before and after propensity score matching

|  | **Full cohort** | | | **Propensity score–matched cohort** | | |
| --- | --- | --- | --- | --- | --- | --- |
|  | **Full-term** | **Moderate to late preterm** | SMD | **Full-term** | **Moderate to late preterm** | SMD |
| **Number of participants** | 8104 | 236 |  | 3540 | 236 |  |
| **Age, median (IQR), years** | 3.72 (3.03, 4.59) | 3.53 (2.84, 4.30) | 0.180 | 3.50 (2.82, 4.28) | 3.53 (2.84, 4.30) | 0.019 |
| **Sex (n, %)** |  |  | 0.041 |  |  | 0.010 |
| Boys | 4333 (53.47) | 131 (55.51) |  | 1947 (55.00) | 131 (55.51) |  |
| Girls | 3771 (46.53) | 105 (44.49) |  | 1593 (45.00) | 105 (44.49) |  |
| **Calendar year** |  |  | 0.270 |  |  | 0.037 |
| 2021 | 644 (7.95) | 18 (7.63) |  | 271 (7.66) | 18 (7.63) |  |
| 2022 | 913 (11.27) | 15 (6.36) |  | 253 (7.15) | 15 (6.36) |  |
| 2023 | 2485 (30.66) | 57 (24.15) |  | 821 (23.19) | 57 (24.15) |  |
| 2024 | 2173 (26.81) | 72 (30.51) |  | 1093 (30.88) | 72 (30.51) |  |
| 2025 | 1889 (23.31) | 74 (31.36) |  | 1102 (31.13) | 74 (31.36) |  |
| **Admission season** |  |  | 0.091 |  |  | 0.015 |
| Spring (March to May) | 2216 (27.34) | 66 (27.97) |  | 1007 (28.45) | 66 (27.97) |  |
| Summer (June to August) | 1855 (22.89) | 53 (22.46) |  | 804 (22.71) | 53 (22.46) |  |
| Autumn (September to November) | 2323 (28.66) | 60 (25.42) |  | 889 (25.11) | 60 (25.42) |  |
| Winter (December to February) | 1710 (21.10) | 57 (24.15) |  | 840 (23.73) | 57 (24.15) |  |

**Abbreviations:** IQR=interqutile range; SMD==standard mean difference

**Table S6** Characteristics of moderate-to-late preterm and full-term children in middle childhood to early adolescence (6-14 years) within Subcohort A before and after propensity score matching.

|  | **Full cohort** | | | **Propensity score–matched cohort** | | |
| --- | --- | --- | --- | --- | --- | --- |
|  | **Full-term** | **Moderate to late preterm** | SMD | **Full-term** | **Moderate to late preterm** | SMD |
| **Number of participants** | 5160 | 90 |  | 1346 | 90 |  |
| **Age, median (IQR), years** | 7.98 (6.94, 9.66) | 7.75 (6.78, 9.20) | 0.124 | 7.66 (6.76, 9.31) | 7.75 (6.78, 9.20) | 0.021 |
| **Sex (n, %)** |  |  | 0.132 |  |  | 0.008 |
| Boys | 2701 (52.34) | 53 (58.89) |  | 798 (59.29) | 53 (58.89) |  |
| Girls | 2459 (47.66) | 37 (41.11) |  | 548 (40.71) | 37 (41.11) |  |
| **Calendar year** |  |  | 0.499 |  |  | 0.038 |
| 2021 | 144 (2.79) | 1 (1.11) |  | 11 (0.82) | 1 (1.11) |  |
| 2022 | 298 (5.78) | 3 (3.33) |  | 43 (3.19) | 3(3.33) |  |
| 2023 | 2800 (54.26) | 31 (34.44) |  | 475 (35.29) | 31 (34.44) |  |
| 2024 | 1349 (26.14) | 37 (41.11) |  | 557 (41.38) | 37 (41.11) |  |
| 2025 | 569 (11.03) | 18 (20.00) |  | 260 (19.32) | 18 (20.00) |  |
| **Admission season** |  |  | 0.209 |  |  | 0.063 |
| Spring (March to May) | 892 (17.29) | 21 (23.33) |  | 341 (25.33) | 21 (23.33) |  |
| Summer (June to August) | 1167 (22.62) | 24 (26.67) |  | 328 (24.37) | 24 (26.67) |  |
| Autumn (September to November) | 1761 (34.13) | 26 (28.89) |  | 399 (29.64) | 26 (28.89) |  |
| Winter (December to February) | 1340 (25.97) | 19 (21.11) |  | 278 (20.65) | 19 (21.11) |  |

**Abbreviations:** IQR=interqutile range; SMD==standard mean difference

**Table S7** Characteristics of moderate-to-late preterm and full-term infants (1 month to <2 years) in Subcohort B before and after propensity score matching.

|  | **Full cohort** | | | **Propensity score–matched cohort** | | |
| --- | --- | --- | --- | --- | --- | --- |
|  | **Full-term** | **Moderate to late preterm** | SMD | **Full-term** | **Moderate to late preterm** | SMD |
| **Number of participants** | 16903 | 508 |  | 7541 | 508 |  |
| **Age, median (IQR), years** | 0.83 (0.45, 1.32) | 0.74 (0.37, 1.28) | 0.113 | 0.76 (0.42, 1.24) | 0.74 (0.37, 1.28) | 0.010 |
| **Sex (n, %)** |  |  | 0.084 |  |  | 0.013 |
| Boys | 10838 (64.12) | 346 (68.11) |  | 5092 (67.52) | 346 (68.11) |  |
| Girls | 6065 (35.88) | 162 (31.89) |  | 2449 (32.48) | 162 (31.89) |  |
| **Calendar year** |  |  | 0.352 |  |  | 0.040 |
| 2016 | 524 (3.10) | 14 (2.76) |  | 214 (2.84) | 14 (2.76) |  |
| 2017 | 2761 (16.33) | 60 (11.81) |  | 865 (11.47) | 60 (11.81) |  |
| 2018 | 3331 (19.71) | 72 (14.17) |  | 1053 (13.96) | 72 (14.17) |  |
| 2019 | 3250 (19.23) | 82 (16.14) |  | 1195 (15.85) | 82 (16.14) |  |
| 2020 | 807 (4.77) | 17 (3.35) |  | 275 (3.65) | 17 (3.35) |  |
| 2021 | 1135 (6.71) | 37 (7.28) |  | 588 (7.80) | 37 (7.28) |  |
| 2022 | 901 (5.33) | 26 (5.12) |  | 418 (5.54) | 26 (5.12) |  |
| 2023 | 1129 (6.68) | 42 (8.27) |  | 635 (8.42) | 42 (8.27) |  |
| 2024 | 1435 (8.49) | 63 (12.40) |  | 950 (12.60) | 63 (12.40) |  |
| 2025 | 1630 (9.64) | 95 (18.70) |  | 1348 (17.88) | 95 (18.70) |  |
| **Admission season** |  |  | 0.058 |  |  | 0.017 |
| Spring (March to May) | 4167 (24.65) | 135 (26.57) |  | 1960 (25.99) | 135 (26.57) |  |
| Summer (June to August) | 3744 (22.15) | 104 (20.47) |  | 1570 (20.82) | 104 (20.47) |  |
| Autumn (September to November) | 4058 (24.01) | 117 (23.03) |  | 1772 (23.50) | 117 (23.03) |  |
| Winter (December to February) | 4934 (29.19) | 152 (29.92) |  | 2239 (29.69) | 152 (29.92) |  |

**Abbreviations:** IQR=interqutile range; SMD==standard mean difference

**Table S8** Characteristics of moderate-to-late preterm and full-term children in early childhood (2-<6 years) within Subcohort B before and after propensity score matching

|  | **Full cohort** | | | **Propensity score–matched cohort** | | |
| --- | --- | --- | --- | --- | --- | --- |
|  | **Full-term** | **Moderate to late preterm** | SMD | **Full-term** | **Moderate to late preterm** | SMD |
| **Number of participants** | 17005 | 345 |  | 5173 | 345 |  |
| **Age, median (IQR), years** | 3.55 (2.92, 4.39) | 3.48 (2.79, 4.24) | 0.095 | 3.48 (2.78, 4.28) | 3.48 (2.79, 4.24) |  |
| **Sex (n, %)** |  |  | 0.003 |  |  |  |
| Boys | 9238 (54.33) | 188 (54.49) |  | 2798 (54.09) | 188 (54.49) |  |
| Girls | 7767 (45.67) | 157 (45.51) |  | 2375 (45.91) | 157 (45.51) |  |
| **Calendar year** |  |  | 0.527 |  |  |  |
| 2016 | 255 (1.50) | 3(0.87) |  | 51 (0.99) | 3(0.87) |  |
| 2017 | 1790 (10.53) | 19 (5.51) |  | 277 (5.35) | 19 (5.51) |  |
| 2018 | 2383 (14.01) | 37 (10.72) |  | 560 (10.83) | 37 (10.72) |  |
| 2019 | 3267 (19.21) | 50 (14.49) |  | 751 (14.52) | 50 (14.49) |  |
| 2020 | 794 (4.67) | 4 (1.16) |  | 60 (1.16) | 4 (1.16) |  |
| 2021 | 1175 (6.91) | 21 (6.09) |  | 300 (5.80) | 21 (6.09) |  |
| 2022 | 1184 (6.96) | 14 (4.06) |  | 233 (4.50) | 14 (4.06) |  |
| 2023 | 2252 (13.24) | 48 (13.91) |  | 679 (13.13) | 48 (13.91) |  |
| 2024 | 2184 (12.84) | 63 (18.26) |  | 950 (18.36) | 63 (18.26) |  |
| 2025 | 1721 (10.12) | 86 (24.93) |  | 1312 (25.36) | 86 (24.93) |  |
| **Admission season** |  |  | 0.068 |  |  |  |
| Spring (March to May) | 4216 (24.79) | 89 (25.80) |  | 1320 (25.52) | 89 (25.80) |  |
| Summer (June to August) | 4177 (24.56) | 75 (21.74) |  | 1152 (22.27) | 75 (21.74) |  |
| Autumn (September to November) | 4641 (27.29) | 96 (27.83) |  | 1413 (27.31) | 96 (27.83) |  |
| Winter (December to February) | 3971 (23.35) | 85 (24.64) |  | 1288 (24.90) | 85 (24.64) |  |

**Abbreviations:** IQR=interqutile range; SMD==standard mean difference

**Table S9** Characteristics of moderate-to-late preterm and full-term children in middle childhood to early adolescence (6-14 years) within Subcohort B before and after propensity score matching.

|  | **Full cohort** | | | **Propensity score–matched cohort** | | |
| --- | --- | --- | --- | --- | --- | --- |
|  | **Full-term** | **Moderate to late preterm** | SMD | **Full-term** | **Moderate to late preterm** | SMD |
| **Number of participants** | 7386 | 96 |  | 1421 | 96 |  |
| **Age, median (IQR), years** | 7.88 (6.88, 9.62) | 7.69 (6.84, 8.92) | 0.134 | 7.61 (6.76, 9.24) | 7.69 (6.84, 8.92) | 0.009 |
| **Sex (n, %)** |  |  | 0.128 |  |  | 0.019 |
| Boys | 3917 (53.03) | 57 (59.38) |  | 857 (60.31) | 57 (59.38) |  |
| Girls | 3469 (46.97) | 39 (40.62) |  | 564 (39.69) | 39 (40.62) |  |
| **Calendar year** |  |  | 0.606 |  |  | 0.103 |
| 2016 | 50 (0.68) | 0(0.00) |  | 0(0.00) | 0(0.00) |  |
| 2017 | 437 (5.92) | 2 (2.08) |  | 21 (1.48) | 2 (2.08) |  |
| 2018 | 567 (7.68) | 3 (3.12) |  | 67 (4.71) | 3 (3.12) |  |
| 2019 | 983 (13.31) | 8 (8.33) |  | 122 (8.59) | 8 (8.33) |  |
| 2020 | 170 (2.30) | 0(0.00) |  | 0 (0.00) | 0(0.00) |  |
| 2021 | 257 (3.48) | 2 (2.08) |  | 30 (2.11) | 2 (2.08) |  |
| 2022 | 387 (5.24) | 6(6.25) |  | 95 (6.69) | 6(6.25) |  |
| 2023 | 2512 (34.01) | 26 (27.08) |  | 376 (26.46) | 26 (27.08) |  |
| 2024 | 1461 (19.78) | 31 (32.29) |  | 467 (32.86) | 31 (32.29) |  |
| 2025 | 562 (7.61) | 18 (18.75) |  | 243 (17.10) | 18 (18.75) |  |
| **Admission season** |  |  | 0.142 |  |  | 0.052 |
| Spring (March to May) | 1376 (18.63) | 19 (19.79) |  | 273 (19.21) | 19 (19.79) |  |
| Summer (June to August) | 1958 (26.51) | 25 (26.04) |  | 374 (26.32) | 25 (26.04) |  |
| Autumn (September to November) | 2095 (28.36) | 22 (22.92) |  | 302 (21.25) | 22 (22.92) |  |
| Winter (December to February) | 1957 (26.50) | 30 (31.25) |  | 472 (33.22) | 30 (31.25) |  |

**Abbreviations:** IQR=interqutile range; SMD==standard mean difference

**Table S10** Sensitivity analyses for the associations between moderate-to-late preterm birth and composite severity outcomes, stratified by pediatric age groups.

|  | **OR (95% CI)** | ***p*** | ***p* for interaction** |
| --- | --- | --- | --- |
| **Analysis A: further adjusted for birth weight and breastfeeding patterns** | | | |
| Infants (1 month to <2 years) | 1.10 (0.94, 1.29) | 0.229 | 0.865 |
| Early childhood (2-<6 years) | 1.15 (0.93, 1.43) | 0.195 |
| Middle childhood to early adolescence (6-14 years) | 1.73 (1.21, 2.46) | 0.002 |
| **Analysis B: complete-case analysis** | | | |
| Infants (1 month to <2 years) | 1.15 (0.99, 1.34) | 0.063 | 0.912 |
| Early childhood (2-<6 years) | 1.27 (1.03, 1.56) | 0.023 |
| Middle childhood to early adolescence (6-14 years) | 1.71 (1.21, 2.41) | 0.002 |
| **Analysis C: modeled age as a continuous variable using cubic orthogonal polynomials** | | | |
| Infants (1 month to <2 years) | 1.11 (0.96, 1.29) | 0.169 | 0.205 |
| Early childhood (2-<6 years) | 1.27 (1.03, 1.56) | 0.024 |
| Middle childhood to early adolescence (6-14 years) | 1.71 (1.21, 2.41) | 0.002 |
| **Analysis D: excluded patients with a symptom duration of more than 3 days prior to admission** | | | |
| Infants (1 month to <2 years) | 1.07 (0.81, 1.41) | 0.641 | 0.139 |
| Early childhood (2-<6 years) | 1.38 (0.90, 2.09) | 0.132 |
| Middle childhood to early adolescence (6-14 years) | 3.31 (1.38, 8.12) | 0.007 |

**Abbreviations:** OR=odds ratio; CI=confidence interval

To calculate OR (95% CI), all logistic regression models were adjusted for age, sex, mode of delivery, birth order, calendar year and admission season. To calculate *p* for interaction, likelihood ratio tests were conducted by comparing the maximum likelihood χ2 value from a nested model with and without the multiplicative interaction term of age as a linear variable and preterm status.

**Table S11** Sensitivity analyses for the additive interactions between moderate-to-late preterm birth and 12 respiratory pathogens on composite severity outcomes

|  | **RERI (95% CI)** | **AP (95% CI)** |
| --- | --- | --- |
| **Analysis A: further adjusted for birth weight and breastfeeding patterns** | | |
| RSV | 1.09 (0.28, 2.22) | 0.43 (0.10, 0.57) |
| HRV | 0.04 (-0.47, 0.66) | 0.03 (-0.47, 0.27) |
| IAV | -0.70 (-1.12, 0.22) | -1.62 (-10.30, -0.12) |
| IAV(H1N1) | -1.14 (-1.56, 0.21) | -5.98 (-86.71, 19.72) |
| IAV(H3N2) | -0.18 (-0.87, 3.28) | -0.24 (-11.24, 3.87) |
| IBV | 2.68 (-0.88, 44.02) | 0.69 (-5.15, 2.92) |
| hMPV | -0.21 (-0.78, 0.78) | -0.20 (-1.80, 0.03) |
| HCoV | 0.81 (-0.75, 6.54) | 0.39 (-2.30, 0.94) |
| HPIV | -0.05 (-0.56, 0.72) | -0.05 (-1.17, 0.19) |
| HBoV | 0.66 (-0.68, 4.13) | 0.32 (-1.35, 0.45) |
| ADV | -0.15 (-0.70, 0.89) | -0.17 (-2.34, 0.06) |
| MP | -0.01 (-0.84, 1.20) | -0.01 (-0.65, 0.27) |
| **Analysis B: complete-case analysis** | | |
| RSV | 1.07 (0.25, 2.22) | 0.42 (0.08, 0.56) |
| HRV | 0.07 (-0.44, 0.71) | 0.05 (-0.45, 0.29) |
| IAV | -0.70 (-1.12, 0.21) | -1.63 (-10.34, -0.10) |
| IAV(H1N1) | -1.09 (-1.52, 0.25) | -5.79 (-85.46, 20.34) |
| IAV(H3N2) | -0.20 (-0.89, 3.25) | -0.27 (-11.43, 3.85) |
| IBV | 2.56 (-0.94, 43.03) | 0.67 (-5.42, 2.92) |
| hMPV | -0.18 (-0.75, 0.80) | -0.17 (-1.75, 0.05) |
| HCoV | 0.84 (-0.72, 6.57) | 0.41 (-2.26, 0.96) |
| HPIV | -0.06 (-0.58, 0.73) | -0.06 (-1.25, 0.17) |
| HBoV | 0.68 (-0.67, 4.15) | 0.32 (-1.34, 0.46) |
| ADV | -0.24 (-0.75, 0.74) | -0.31 (-2.88, -0.01) |
| MP | 0.03 (-0.82, 1.28) | 0.01 (-0.63, 0.29) |
| **Analysis C: modeled age as a continuous variable using cubic orthogonal polynomials** | | |
| RSV | 1.10 (0.28, 2.24) | 0.43 (0.10, 0.58) |
| HRV | 0.13 (-0.41, 0.79) | 0.08 (-0.40, 0.31) |
| IAV | -0.69 (-1.13, 0.28) | -1.53 (-10.03, -0.06) |
| IAV(H1N1) | -1.13 (-1.57, 0.44) | -5.13 (-76.53, 17.45) |
| IAV(H3N2) | -0.28 (-0.92, 2.83) | -0.44 (-13.44, 4.42) |
| IBV | 3.81 (-0.81, 58.60) | 0.76 (-3.90, 2.53) |
| hMPV | -0.10 (-0.75, 1.07) | -0.08 (-1.53, 0.13) |
| HCoV | 0.83 (-0.72, 6.60) | 0.40 (-2.34, 1.00) |
| HPIV | -0.14 (-0.62, 0.58) | -0.16 (-1.45, 0.10) |
| HBoV | 0.83 (-0.65, 4.72) | 0.36 (-1.21, 0.48) |
| ADV | -0.06 (-0.68, 1.18) | -0.05 (-1.98, 0.14) |
| MP | 0.17 (-0.72, 1.47) | 0.07 (-0.52, 0.33) |
| **Analysis D:excluded patients with a symptom duration of more than 3 days prior to admission** | | |
| RSV | 2.43 (0.53, 6.43) | 0.71 (0.14, 0.81) |
| HRV | -0.11 (-1.26, 1.49) | -0.06 (-1.25, 0.30) |
| IAV | NA | NA |
| IAV(H1N1) | NA | NA |
| IAV(H3N2) | NA | NA |
| IBV | NA | NA |
| hMPV | -0.53 (-1.39, 1.64) | -0.77 (-9.89, 1.36) |
| HCoV | NA | NA |
| HPIV | -0.38 (-1.21, 1.72) | -0.58 (-9.42, 1.90) |
| HBoV | 0.09 (-1.67, 9.48) | 0.05 (-7.35, 1.62) |
| ADV | 0.03 (-0.97, 3.55) | 0.03 (-6.55, 2.16) |
| MP | NA | NA |

**Abbreviations:** RSV=respiratory syncytial virus; HRV=human rhinovirus; IAV=influenza A virus; IAV(H1N1)=influenza A virus subtype H1N1; IAV(H3N2)=influenza A virus subtype H3N2; IBV=influenza B virus; hMPV=human metapneumoviru; HCoV=human coronavirus; HPIV=human parainfluenza virus; HBoV=human bocavirus; ADV=adenovirus; MP=*mycoplasma pneumoniae*; RERI=relative excess risk due to interaction; AP=attributable proportion due to interaction; NA=not applicable

**Figure S1** Flow diagram of study design


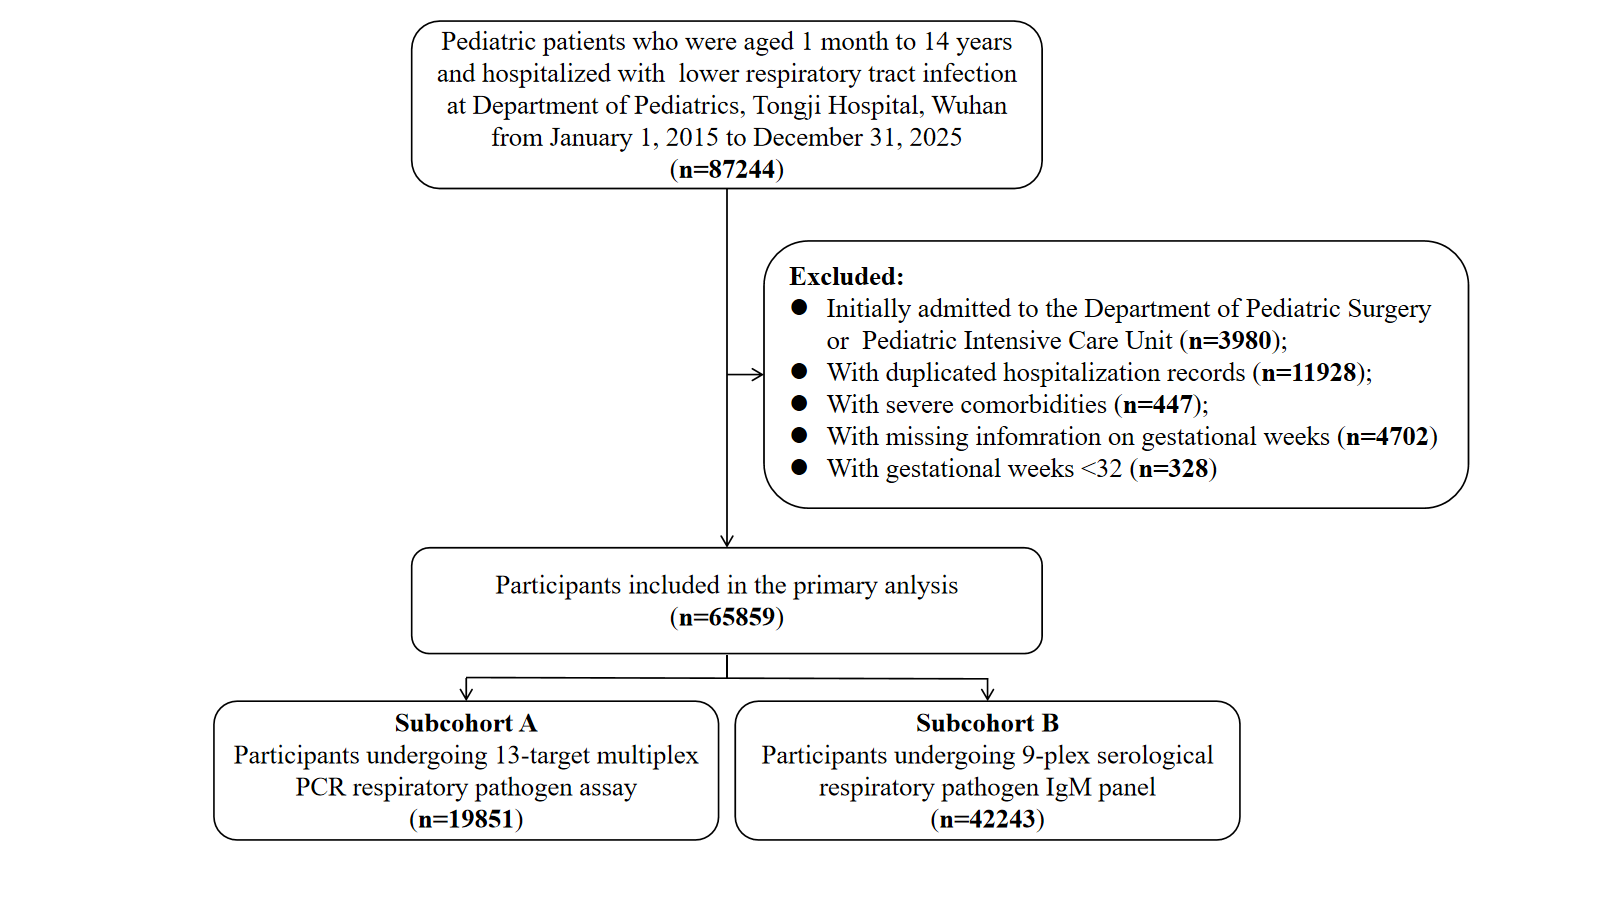

Supplement: Supplementary file 1 [file d0262a7433f8b31a25e376bf.docx]
